# Supplementary material for: Reliability, minimal detectable change and responsiveness to change: Indicators to select the best method to measure sedentary behaviour in older adults in different study designs
Source: PLoS One. 2018 Apr 12;13(4):e0195424. doi: 10.1371/journal.pone.0195424 (PMC5896945; doi:10.1371/journal.pone.0195424)
Supplement: S1 Data file — (XLSX) [file pone.0195424.s002.xlsx]

## Sheet: Data
ID	Day5_totalsittingtime_yesterday	Day5_sittingyesterday_2a	Day5_sittingyesterday_2b	Day5_sittingyesterday_2c	Day5_sittingyesterday_2d	Day5_sittingyesterday_2e	Day5_sittingyesterday_2f	Day5_sittingyesterday_2g	Day5_sittingyesterday_2h	Day5_sittingyesterday_2i	Day5_sittingyesterday_2j	Day5_sittingyesterday_2k	Day6_totalsittingtime	Day6_sittingyesterday_2a	Day6_sittingyesterday_2b	Day6_sittingyesterday_2c	Day6_sittingyesterday_2d	Day6_sittingyesterday_2e	Day6_sittingyesterday_2f	Day6_sittingyesterday_2g	Day6_sittingyesterday_2h	Day6_sittingyesterday_2i	Day6_sittingyesterday_2j	Day6_sittingyesterday_2k	Day7_totalsittingtime	Day7_sittingyesterday_2a	Day7_sittingyesterday_2b	Day7_sittingyesterday_2c	Day7_sittingyesterday_2d	Day7_sittingyesterday_2e	Day7_sittingyesterday_2f	Day7_sittingyesterday_2g	Day7_sittingyesterday_2h	Day7_sittingyesterday_2i	Day7_sittingyesterday_2j	Day7_sittingyesterday_2k	Day8_totalsittingtime	Day8_sittingyesterday_2a	Day8_sittingyesterday_2b	Day8_sittingyesterday_2c	Day8_sittingyesterday_2d	Day8_sittingyesterday_2e	Day8_sittingyesterday_2f	Day8_sittingyesterday_2g	Day8_sittingyesterday_2h	Day8_sittingyesterday_2i	Day8_sittingyesterday_2j	Day8_sittingyesterday_2k	Day8_totalsittingtime_average
D001	390	270	0	30	30	0	120	60	90	60	30	60	315	290	0	30	45	0	150	45	120	35	30	90	315	315	0	30	30	0	60	30	75	45	15	45	330	270	0	30	50	0	30	60	90	40	30	30	270
D002	565	0	0	5	0	0	270	180	105	10	0	0	360	150	0	0	0	30	120	45	105	10	0	0	450	210	0	0	120	10	0	20	90	0	0	0	250	NA	0	0	150	10	0	NA	90	0	0	0	405
D003	605	240	0	0	100	0	20	0	70	30	20	120	570	240	20	25	120	0	90	30	45	30	30	60	630	270	30	210	120	0	60	25	30	30	30	90	630	240	30	0	60	0	40	180	30	20	0	30	6320
D004	380	180	0	30	60	0	0	0	90	20	0	0	465	0	0	30	110	0	35	180	90	20	0	0	570	120	0	40	120	0	60	120	90	20	0	0	670	240	0	60	165	0	80	0	100	25	0	0	750
D005	390	270	0	0	80	30	0	120	60	30	60	30	270	90	30	60	180	0	0	180	90	30	80	30	330	210	0	30	90	0	0	90	90	20	60	30	360	150	0	80	90	30	240	20	90	25	60	30	390
D006	560	150	0	130	40	0	0	80	120	40	0	0	555	150	0	195	30	20	10	25	75	30	20	0	615	165	0	210	40	20	70	0	70	50	0	0	530	150	0	190	30	40	0	0	70	40	0	0	5420
D008	450	300	0	0	270	60	0	25	60	60	15	45	270	150	0	30	90	0	390	30	60	60	0	60	330	150	0	60	90	0	0	30	60	60	0	90	345	300	0	0	160	70	0	40	80	100	30	60	380
D009	240	0	0	60	0	0	0	720	60	30	0	0	240	0	0	240	60	600	0	60	120	30	60	60	480	0	0	420	60	540	0	60	60	30	30	60	360	0	0	480	60	600	0	60	60	30	30	90	540
D010	420	240	0	0	105	30	20	110	80	50	130	0	480	210	0	0	75	30	40	40	90	60	50	180	440	225	0	0	80	40	40	50	70	50	70	0	500	245	0	0	45	35	40	25	45	40	70	0	430
D012	460	30	110	60	20	0	20	80	60	60	20	0	420	0	240	60	10	0	10	10	60	30	0	0	570	30	240	90	15	20	10	40	60	45	10	0	490	60	60	60	10	0	150	30	60	40	20	0	460
D013	540	270	0	0	150	120	0	0	90	45	0	0	330	240	0	30	45	45	0	45	60	0	0	0	540	270	0	35	90	30	0	0	60	30	0	0	660	420	0	0	70	25	0	35	60	30	0	0	570
D014	600	300	0	180	0	0	0	0	90	0	0	0	300	120	0	30	0	0	0	60	90	0	0	0	510	150	0	30	30	0	0	150	60	30	0	0	510	270	0	60	0	0	0	0	90	0	0	0	510
D016	480	180	0	45	90	30	30	75	90	90	30	0	420	150	0	60	60	30	0	90	90	30	30	0	420	120	0	60	60	30	0	120	60	60	30	0	390	210	0	90	60	60	0	15	60	30	120	0	390
D017	270	135	0	0	0	0	0	135	0	0	0	0	360	150	0	0	90	0	0	0	60	60	0	0	360	90	0	0	60	60	0	0	90	0	0	60	360	120	0	0	90	60	0	0	90	0	0	0	360
D018	450	270	0	90	90	0	0	30	60	30	60	0	360	210	0	60	30	0	240	90	60	30	0	0	330	180	0	60	60	30	0	0	30	30	30	0	360	120	0	30	30	0	0	30	120	30	30	0	390
D019	420	90	30	0	30	0	0	60	45	15	30	30	720	15	0	0	15	420	0	120	60	15	0	0	420	20	0	0	30	0	0	0	75	20	0	15	660	50	0	0	30	0	0	90	45	15	0	0	420
D020	570	270	0	15	135	0	0	150	0	0	0	0	480	250	0	70	0	0	0	70	90	0	0	0	460	260	0	20	60	0	0	90	30	0	0	0	480	285	0	0	150	0	0	30	15	0	0	0	480
D022	600	300	0	30	20	0	0	0	120	40	90	0	690	240	150	0	30	0	0	0	120	60	90	0	570	240	150	30	0	0	0	0	90	30	30	0	540	150	150	0	0	0	30	90	90	30	0	0	510
[truncated: 74 more columns]

## Sheet: Variable labels
Gender	(0=male, 1=female)
Height	in cm
Weight	in kg
SUMSITDay1-14	Objective measurement of sedentary behaviour per day
The rest of the variables	Subjective measurement of sedentary behaviour per day (see questionnaire in Suppl. Material)
## On day 5-11 participants completed 11 proxy measures of SB
a. Watching TV
b. Computer work
c. Computer leisure
d. Read
e. Listening music
f. Hobby
g. Talking
h. Eating
i. Self-care
j. Household
k. Nap
We were interested in TV viewing, and the sum of all proxies.
1. TV = proxy a
3. Sum = proxy a+b+c+d+e+f+g+h+i+j+k
